# Supplementary material for: Time evolution and dynamic cellular uptake of PEGYlated gold nanorods
Source: Royal Society of Chemistry journal article supplement (doi:10.1039/c5ra24460a), 2016-01-01
Supplement: c5ra24460a1.pdf [file c5ra24460a1.pdf]

## Time evolution and dynamic cellular uptake of PEGYlated gold nanorods

Hongyuan Song,<sup>‡a</sup> Qingqiang Xu,<sup>‡b</sup> Hongwei Di,<sup>b</sup> Ting Guo,<sup>a</sup> Zhongtian Qi<sup>\*b</sup> and Shihong Zhao<sup>\*a</sup>

<sup>a</sup>Department of Ophthalmology, Changhai Hospital, Second Military Medical University, Shanghai 200433, China. <sup>b</sup>Department of Microbiology, Second Military Medical University, Shanghai 200433, China.

\*Correspondence: Department of Ophthalmology, Changhai Hospital, Second Military Medical University, Shanghai 200433, China. Fax: 86-21-31161991; Tel: 86-21-31161991; E-mail: zhaosh@smmu.edu.cn

Department of Microbiology, Second Military Medical University, Shanghai 200433, China. E-mail: qizt@smmu.edu.cn (Co-correspondence)

### Materials

Double distilled water was used as common solvent in this investigation. Hydrogen tetrachloroaurate (III) trihydrate ( $\text{HAuCl}_4 \cdot 3\text{H}_2\text{O}$ ), silver nitrate ( $\text{AgNO}_3$ ), L-ascorbic acid (AA), sulphuric acid ( $\text{H}_2\text{SO}_4$ ), nitric acid ( $\text{HNO}_3$ ), cetyltrimethyl ammonium bromide (CTAB) and sodium borohydride ( $\text{NaBH}_4$ ) were purchased from Sangon Biotech. M $\beta$ CD, CPZ and EIPA were purchased from Sigma. Pooled validated siRANs targeting clathrin heavy chain, caveolin-1 and Ras-related C3 botulinum toxin substrate 1 were purchased from Dharmacom. The following antibodies were used: GAPDH (CST), clathrin heavy chain (BD transduction laboratories), caveolin-1 (Sigma), Ras-related C3 botulinum toxin substrate1 (Millipore), HRP-conjugated mouse and rabbit secondary antibodies (Invitrogen). Cell counting kit-8 and Fast Silver Stain Kit

were purchased from Beyotime Biotechnology. Cell culture plates were purchased from Corning Inc. and all other reagents were of analytical grade.

### **Preparation and characterization of GNRs**

GNRs were synthesized using seed-mediated growth method according to previously described procedures with minor revision. First, we prepared CTAB-capped Au seeds through chemical reduction method: 7.5 mL 100 mM CTAB was mixed with 200  $\mu$ L 10 mM HAuCl<sub>4</sub> and the volume was fixed to 9.4 mL by adding water followed by adding 0.6 mL 10mM ice-cold NaBH<sub>4</sub> aqueous solution. The seeds formed immediately and were incubated for 2.5 h at 29°C. The growth solution for GNRs consisted of a mixture of 100 mL 0.1 M CTAB, 5 mL 10 mM HAuCl<sub>4</sub>, 1 mL 10 mM AgNO<sub>3</sub>, 2 mL 0.92 M H<sub>2</sub>SO<sub>4</sub> and 800  $\mu$ L 100 mM Ascorbic acid. Then, 240  $\mu$ L seeds were added into the solution and incubated for 12 h at 29°C. The reaction was stopped by centrifuging at 10000g for 15 min. The GNRs were washed once and dispersed in the water containing 20mg mPEG<sub>5000</sub>-SH. After incubation for 8 h at 29°C, the reaction was stopped by centrifuging at 10000g. The PEGlated GNRs were washed three times and resuspended in water for subsequent use. The size and shape of GNRs and PEGlated GNRs were characterized under a transmission electron microscope (TEM, H-7650, Hitachi). The visible and near-infrared absorption spectrum was determined by Biotek synergy2 (Biotek). The nanorods zeta potential was determined by Malvern Instrument (Malvern Nano-ZS). The concentration of PEGlated GNRs were determined using inductively coupled plasma mass spectrometry (ICP-MS).

### **Cell culture**

Human retinal endothelial cells were purchased from ScienCell (San Diego, USA) and cultured in Endothelial Cell Medium (ECM) supplemented with 5% FBS, 1% L-glutamine. The

cells were incubated at 37°C in a humidified atmosphere with 5% CO<sub>2</sub>. When growing to 80%-90% confluence, the cells were seeded into indicated plate for different assays.

### **Cell viability assay**

The viabilities of cells were determined by Cell Counting Kit-8 assay using 96-well plate.  $3 \times 10^3$  cells were seeded into plates and cultured overnight. The grown medium was then replaced with medium containing various concentrations of PEGlated GNRs or chemical inhibitors and incubated for indicated times. We then dumped the medium, washed 2 times with phosphate buffered saline (PBS) and added 110µL fresh medium containing 10µL CCK-8. After incubation for about 2 hours, the optical density was measured at 450nm using Biotek synergy2 (Biotek).

### **Analysis of protein corona and PEGlated GNRs aggregation**

After PEGlated GNRs were added into cell culture medium and incubated with HREC for 1 h, 24 h and 48 h, GNRs were collected by centrifuging at 8000g and washed twice with PBS. Total protein was extracted in a modified Buffer with 0.5% SDS in the presence of proteinase inhibitor cocktail. SDS-polyacrylamide gel electrophoresis (SDS-PAGE) was used to assess the proteins, while fetal bovine serum (FBS) solution was used as control sample. The proteins were stained with Fast Silver Kit according to the manufactory's instructions. Detailed proteins adsorbed by GNRs were analyzed using LC-MS by Shanghai Applied Protein Technology. For the TEM analysis, PEGlated GNRs cultured with HREC for 1h, 24 h and 48 h were drop on copper net and observed by TEM. For visible and near-infrared absorption spectrum detection, PEGlated GNRs collected from different time were washed once with PBS, resuspended in water and determined using Biotek synergy2 (Biotek).

### **Western blot analysis**

After treatment with siRNAs for 48h, cells were washed with PBS twice and treated with RIPA Lysis Buffer. An equal amount of protein was loaded into sodium dodecyl sulfate–polyacrylamide electrophoresis (SDS–PAGE, 10%) and transferred to polyvinylidene fluoride (PVDF) membranes. After blocking with 5 % (w/v) skimmed milk for 2 h at room temperature, the membrane was incubated with specific primary antibodies overnight at 4°C on the shaker. Then, membranes were incubated with indicated secondary antibodies for 2 hours at room temperature. Finally, membranes were visualized using the GeneGnome HR Image Capture System (Syngene, USA).

### **Cellular localization of PEGlated GNRs**

HREC cells were seeded in 10 cm dish and cultured for 24 hours. Then PEGlated GNRs were added into the medium and incubated for another 3 hours. In order to assess the uptake of PEGlated GNRs after culturing for 24 h and 48 h, we initially collected cell culture medium containing PEGlated GNRs after being cultured with HREC for 24 h and 48 h separately. Then cell culture medium containing nanorods were added into the dish and incubated for another 3 h. The cells treated with PEGlated GNRs were collected by scraping and fixed with a fixative mixture consisting of 2% paraformaldehyde and 2% glutaraldehyde overnight at 4°C. After three washes with PBS, the cells were coagulated with glutaraldehyde and a little plasma. The cell masses were cut into small pieces, washed with PBS, post-fixed with 1% osmium acid for 2 hours, dehydrated in a graded series of ethanol and acetone, and embedded in Epon812 epoxy resin. About 70 nm thick sections were cut, and stained with uranylacetate and lead nitrate and observed using TEM (H-7650, Hitachi).

### **Cellular uptake of PEGlated GNRs**

For inductively coupled plasma mass spectrometry (ICP-MS) assay, HREC cells were seeded in 6-well plate and cultured for 24 hours. The culture medium was changed to fresh medium containing chemical inhibitors and the cells were incubated with these inhibitors for 1 h. Then PEGlated GNRs were added into the medium and incubated for another 3 hours. In order to assess the uptake of PEGlated GNRs after culturing for 24 h and 48 h, we initially collected cell culture medium containing PEGlated GNRs after being cultured with HREC for 24 h and 48 h separately. After the cells were incubated with chemical inhibitors for 1h, cell culture medium containing nanorods mixed with chemical inhibitors were added into the plate and incubated for another 3 h. Measurements for each group were repeated three times. After this process, the samples were collected and digested with 250  $\mu$ L HNO<sub>3</sub> for 24 h. Once the samples were digested, ultrapure water was used to bring the final volume to 5 mL. Finally, the samples were measured by NexION 300X (GE).

### **Statistical analysis**

All data were presented as mean  $\pm$  standard deviation (SD). One-way ANOVA and t test were used to evaluate the data. A significance level of  $p < 0.05$  was supposed to be statistically significant.

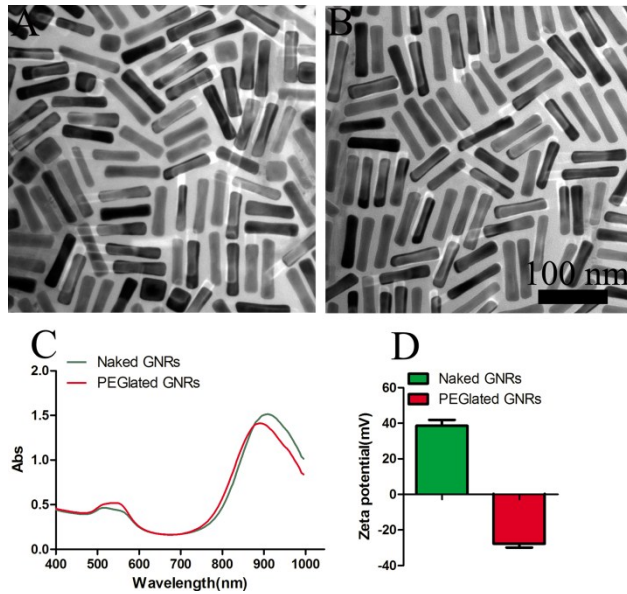

**Fig. S1** Characterization of PEGylated GNRs. (A) TEM image of naked GNRs. (B) TEM image of PEGylated GNRs. (C) UV-Vis-NIR absorption spectra of GNRs. (D) Zeta potential of GNRs.

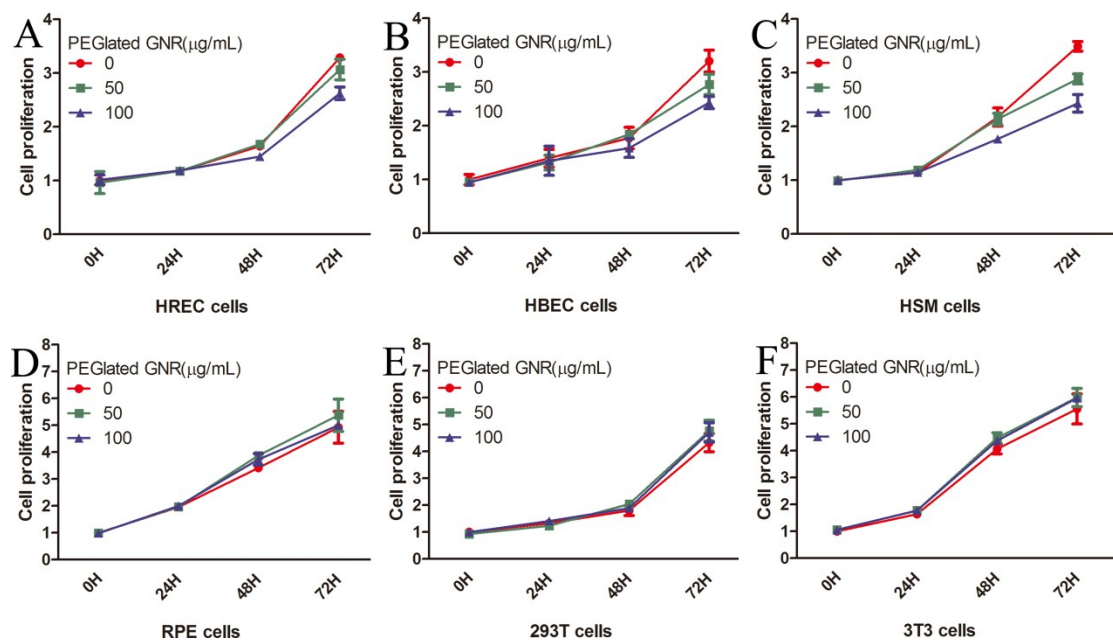

**Fig. S2** Cell cytotoxicity assessment of PEGylated GNRs on different cells. A: human retinal endothelial cells (HREC), B: Human brain endothelial cells (HBEC), C: Human smooth muscular cells (HSMC), D: Human retinal pigment epithelium cells (RPE), E: Human embryonic kidney 293T cells (293T) and F: NIH 3T3 cells were exposed to PEGylated GNRs at different

concentrations for 0h, 24h, 48h and 72h separately. Cell viability of the nanorods treated cells was detected by cell counting-8 kit (CCK-8 kit). Data represent the means  $\pm$  SD of three separate samples (\*\*,  $p < 0.01$ ).

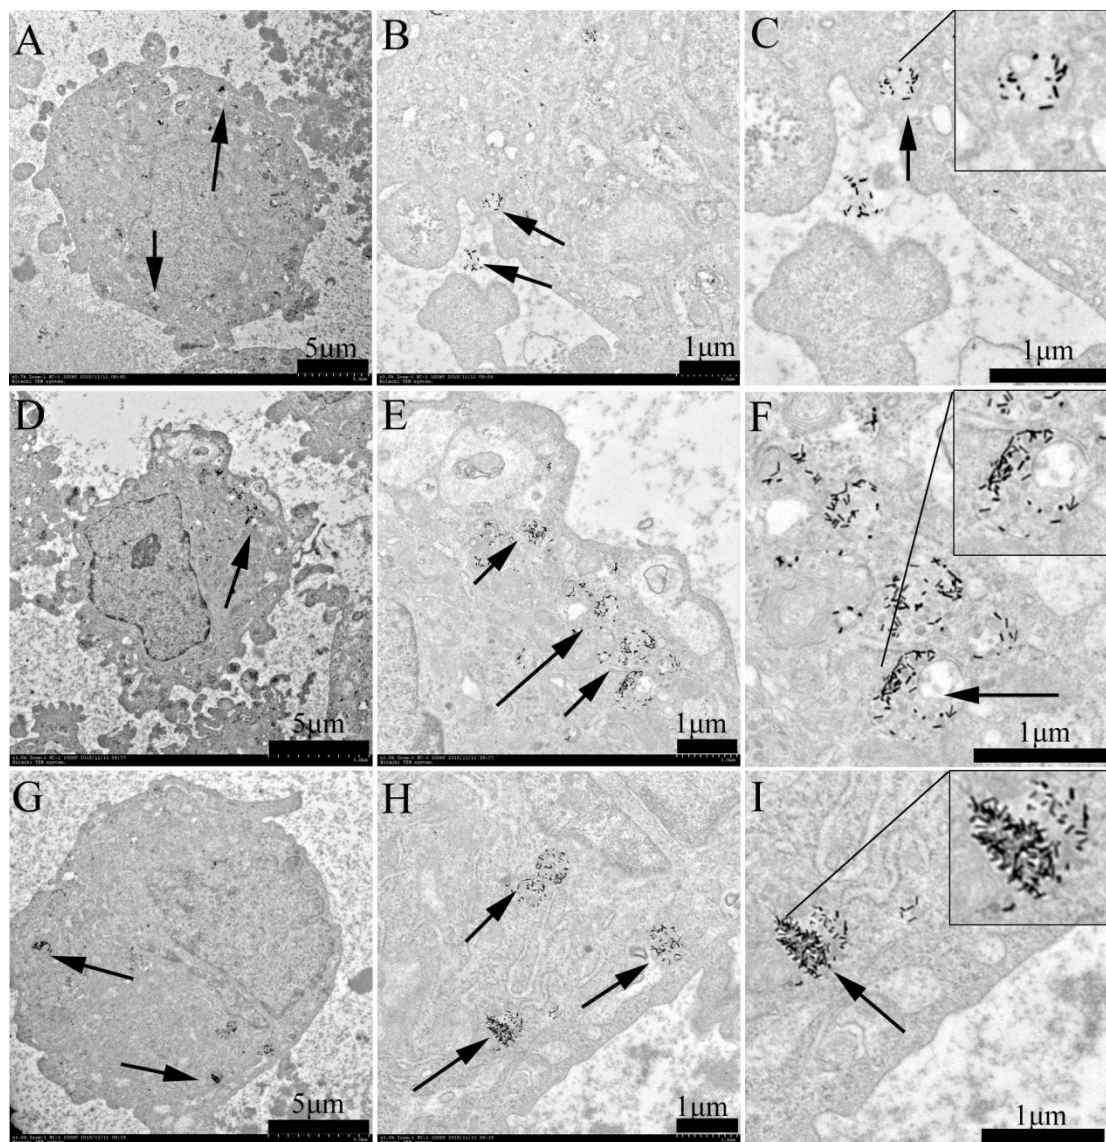

**Fig. S3** Cellular location of internalized PEGylated GNRs at different time using TEM. Representative images of cellular location of internalized nanorods at 0h (A,B,C), 24h (D,E,F) and 48h (G,H,I). The arrows indicated the internalized nanorods.

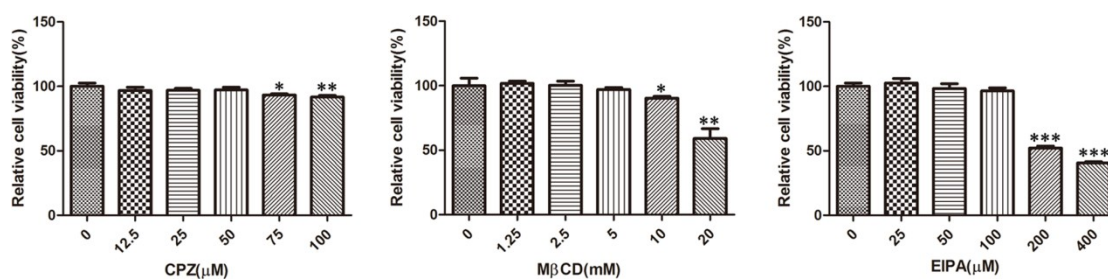

**Fig. S4** Determination of concentrations of chemical inhibitors. Cell viability assay of CPZ, MβCD and EIPA were detected using CCK-8. Data represent the means  $\pm$  SD of three separate samples (\*,  $p < 0.05$ , \*\*,  $p < 0.01$ , \*\*\*,  $p < 0.001$ ).

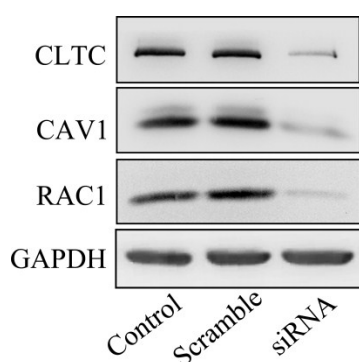

**Fig. S5** Silence efficiency of siRNAs targeting CLTC, CAV1 and RAC1.

**Table S1.** Proteins identified by LC-MS on PEGylated GNRs cultured with HREC for 1 h.

| Access <sup>a)</sup> | Protein Name                                 | SpC <sup>b)</sup> | MV <sup>c)</sup> | Species <sup>d)</sup> |
|----------------------|----------------------------------------------|-------------------|------------------|-----------------------|
| P02769               | Serum albumin                                | 8                 | 69292.69         | B                     |
| P12763               | Alpha-2-HS-glycoprotein                      | 3                 | 38418.34         | B                     |
| Q03247               | Apolipoprotein E                             | 3                 | 35979.44         | B                     |
| P63267               | Actin, gamma-enteric smooth muscle           | 3                 | 41876.43         | H                     |
| E1BGN3               | Histone H3                                   | 2                 | 15417.87         | B                     |
| P01030               | Complement C4 (Fragments)                    | 2                 | 101550.02        | B                     |
| P01045               | Kininogen-2                                  | 2                 | 68709.21         | B                     |
| P01966               | Hemoglobin subunit alpha                     | 2                 | 15184.18         | B                     |
| P13384               | Insulin-like growth factor-binding protein 2 | 2                 | 34014.62         | B                     |
| P63258               | Actin, cytoplasmic 2                         | 2                 | 41792.4          | B                     |
| Q05718               | Insulin-like growth factor-binding protein 6 | 2                 | 24966.7          | B                     |
| Q28107               | Coagulation factor V                         | 2                 | 248980.17        | B                     |
| Q29443               | Serotransferrin                              | 2                 | 77752.38         | B                     |
| Q3MHN5               | Vitamin D-binding protein                    | 2                 | 53341.5          | B                     |
| Q3SZ57               | Alpha-fetoprotein                            | 2                 | 68586.95         | B                     |
| Q5J801               | Endopin 2B                                   | 2                 | 47001.11         | B                     |
| P18065               | Insulin-like growth factor-binding protein 2 | 2                 | 34813.78         | H                     |



|           |                                                          |   |           |   |
|-----------|----------------------------------------------------------|---|-----------|---|
| Q6NXT2    | Histone H3.3C                                            | 2 | 15213.56  | H |
| E2DRY6    | Enolase                                                  | 2 | 36554.25  | H |
| P02765    | Alpha-2-HS-glycoprotein                                  | 2 | 39324.24  | H |
| A0A075B6Z | Protein TRAJ56 (Fragment)                                | 2 | 2110.41   | H |
| 2         |                                                          |   |           |   |
| A0A077SA0 | Lysozyme                                                 | 1 | 17898.63  | B |
| 6         |                                                          |   |           |   |
| A5PKK5    | SMARCA2 protein                                          | 1 | 176920.88 | B |
| B0JYN3    | L-lactate dehydrogenase                                  | 1 | 36724.17  | B |
| E1B9F6    | Elongation factor 1-alpha                                | 1 | 50169.26  | B |
| F1MB08    | Alpha-enolase                                            | 1 | 47283.5   | B |
| F1MCF8    | Uncharacterized protein                                  | 1 | 24501.16  | B |
| F1MD79    | Uncharacterized protein (Fragment)                       | 1 | 130051.7  | B |
| F2Z4E8    | Histone H2B                                              | 1 | 13921.97  | B |
| G3N000    | Uncharacterized protein (Fragment)                       | 1 | 155793.72 | B |
| P07195    | L-lactate dehydrogenase B chain                          | 1 | 36638.07  | H |
| P07910    | Heterogeneous nuclear ribonucleoproteins                 | 1 | 33669.62  | H |
|           | C1/C2                                                    |   |           |   |
| P08670    | Vimentin                                                 | 1 | 53651.05  | H |
| P17936    | Insulin-like growth factor-binding protein 3             | 1 | 31673.9   | H |
| P31146    | Coronin-1A                                               | 1 | 51025.7   | H |
| P49913    | Cathelicidin antimicrobial peptide                       | 1 | 19301.17  | H |
| P51531    | Probable global transcription activator                  | 1 | 181277.31 | H |
|           | SNF2L2                                                   |   |           |   |
| Q05639    | Elongation factor 1-alpha 2                              | 1 | 50469.57  | H |
| Q14004    | Cyclin-dependent kinase 13                               | 1 | 164921.24 | H |
| Q6ZMW3    | Echinoderm microtubule-associated                        | 1 | 217896.93 | H |
|           | protein-like 6                                           |   |           |   |
| Q8IYT2    | Cap-specific mRNA (nucleoside-2'-O-)-methyltransferase 2 | 1 | 88118.8   | H |
| Q8IZ21    | Phosphatase and actin regulator 4                        | 1 | 78210.25  | H |
| Q8NGT2    | Olfactory receptor 13J1                                  | 1 | 34688.41  | H |

**Table S2.** Proteins identified by LC-MS on PEGylated GNRs cultured with HREC for 24 h.

| Access <sup>a)</sup> | Protein Name                                                         | SpC <sup>b)</sup> | MV <sup>c)</sup> | Species <sup>d)</sup> |
|----------------------|----------------------------------------------------------------------|-------------------|------------------|-----------------------|
| B0JYQ0               | ALB protein                                                          | 37                | 69292.74         | B                     |
| P02769               | Serum albumin                                                        | 37                | 69292.69         | B                     |
| P98160               | Basement membrane-specific heparan sulfate proteoglycan core protein | 29                | 468825.05        | H                     |
| Q28085               | Complement factor H                                                  | 27                | 140372.52        | B                     |
| F1MQ37               | Uncharacterized protein                                              | 26                | 227100.21        | B                     |
| A0A024R1             | Myosin, heavy polypeptide 9, non-muscle,                             | 23                | 226529.66        | H                     |

| N1      |                                              | isoform CRA_a |           |   |
|---------|----------------------------------------------|---------------|-----------|---|
| Q7SIH1  | Alpha-2-macroglobulin                        | 22            | 167574.07 | B |
| P07996  | Thrombospondin-1                             | 19            | 129381.43 | H |
| Q03247  | Apolipoprotein E                             | 18            | 35979.44  | B |
| F1N3A1  | Thrombospondin-1                             | 17            | 129390.46 | B |
| Q5M8T4  | Connective tissue growth factor              | 17            | 38069.16  | H |
| G3X6N3  | Serotransferrin                              | 16            | 77665.31  | B |
| F1MKS5  | Histidine-rich glycoprotein                  | 16            | 60742.97  | B |
| Q2UVX4  | Complement C3                                | 15            | 187250.98 | B |
| P01044  | Kininogen-1                                  | 15            | 68889.4   | B |
| P34955  | Alpha-1-antiproteinase                       | 15            | 46103.42  | B |
| Q2TBQ1  | Coagulation factor XIII, B polypeptide       | 15            | 75166.21  | B |
| Q3ZBS7  | Uncharacterized protein                      | 15            | 53574.53  | B |
| P13384  | Insulin-like growth factor-binding protein 2 | 14            | 34014.62  | B |
| Q27975  | Heat shock 70 kDa protein 1A                 | 14            | 70257.65  | B |
| V9HWB8  | Pyruvate kinase                              | 14            | 57936.25  | H |
| F1MER7  | Uncharacterized protein (Fragment)           | 13            | 466023.94 | B |
| K4JDT2  | Alpha-2-macroglobulin variant 20             | 13            | 98342.31  | B |
| K4JF16  | Alpha-2-macroglobulin variant 23             | 13            | 101358.71 | B |
| P01045  | Kininogen-2                                  | 13            | 68709.21  | B |
| P19120  | Heat shock cognate 71 kDa protein            | 13            | 71239.66  | B |
| P334331 | Histidine-rich glycoprotein (Fragments)      | 13            | 44470.06  | B |
| P08107  | Heat shock 70 kDa protein 1A/1B              | 13            | 70051.38  | H |
| P63261  | Actin, cytoplasmic 2                         | 13            | 41792.4   | H |
| E9PKE3  | Heat shock cognate 71 kDa protein            | 13            | 68804.98  | H |
| F1MSZ6  | Antithrombin-III                             | 12            | 52439.59  | B |
| O18739  | Connective tissue growth factor              | 12            | 37923.87  | B |
| Q28107  | Coagulation factor V                         | 12            | 248980.17 | B |
| P60712  | Actin, cytoplasmic 1                         | 12            | 41736.29  | B |
| P15497  | Apolipoprotein A-I                           | 12            | 30275.95  | B |
| E1BH06  | Uncharacterized protein                      | 11            | 192762.75 | B |
| F1MDH3  | Uncharacterized protein (Fragment)           | 11            | 270812.35 | B |
| P02081  | Hemoglobin fetal subunit beta                | 11            | 15859.03  | B |
| E1BNR0  | Uncharacterized protein                      | 10            | 515752.39 | B |
| Q28065  | C4b-binding protein alpha chain              | 10            | 68885.75  | B |
| Q76LV1  | Heat shock protein HSP 90-beta               | 10            | 83252.2   | B |
| P02751  | Fibronectin                                  | 10            | 262621.56 | H |
| Q9Y490  | Talin-1                                      | 10            | 269764.06 | H |
| A0A024R | Heat shock protein 90kDa alpha (Cytosolic),  | 10            | 83263.22  | H |
| D80     | class B member 1, isoform CRA_a              |               |           |   |
| A5D984  | Pyruvate kinase 3                            | 9             | 57948.27  | B |
| G3X7F3  | Uncharacterized protein (Fragment)           | 9             | 74144.22  | B |
| G5E5A9  | Fibronectin                                  | 9             | 272119.4  | B |
| G3MXL3  | Uncharacterized protein (Fragment)           | 9             | 62891.54  | B |

|          |                                                          |   |           |   |
|----------|----------------------------------------------------------|---|-----------|---|
| A5PJE3   | Fibrinogen alpha chain                                   | 9 | 66997.31  | B |
| O02717   | Non-muscle myosin heavy chain (Fragment)                 | 9 | 72370.21  | B |
| P00735   | Prothrombin                                              | 9 | 70504.75  | B |
| Q14767   | Latent-transforming growth factor beta-binding protein 2 | 9 | 195049.92 | H |
| P06733   | Alpha-enolase                                            | 9 | 47168.41  | H |
| Q86YZ3   | Hornerin                                                 | 9 | 282386.64 | H |
| Q92176   | Coronin-1A                                               | 8 | 50978.63  | B |
| F1MB08   | Alpha-enolase                                            | 8 | 47283.5   | B |
| P62935   | Peptidyl-prolyl cis-trans isomerase A                    | 8 | 17869.16  | B |
| P07355   | Annexin A2                                               | 8 | 38603.6   | H |
| B8ZX62   | Tissue plasminogen activator                             | 8 | 62964.55  | H |
| P18065   | Insulin-like growth factor-binding protein 2             | 8 | 34813.78  | H |
| A0A024R6 | Coronin                                                  | 8 | 51025.7   | H |
| 11       |                                                          |   |           |   |
| A2I7N1   | Serpin A3-5                                              | 7 | 46396.82  | B |
| F1N169   | Uncharacterized protein                                  | 7 | 281051.32 | B |
| G3N0V2   | Uncharacterized protein                                  | 7 | 63150.56  | B |
| M0QVY0   | Uncharacterized protein                                  | 7 | 60803.12  | B |
| P04272   | Annexin A2                                               | 7 | 38611.63  | B |
| P28800   | Alpha-2-antiplasmin                                      | 7 | 54710.2   | B |
| P12763   | Alpha-2-HS-glycoprotein                                  | 7 | 38418.34  | B |
| Q2KIG3   | Carboxypeptidase B2                                      | 7 | 48821.13  | B |
| Q76LV2   | Heat shock protein HSP 90-alpha                          | 7 | 84729.76  | B |
| P01966   | Hemoglobin subunit alpha                                 | 7 | 15184.18  | B |
| A0A087W  | Filamin-A                                                | 7 | 245848.1  | H |
| WY3      |                                                          |   |           |   |
| Q2VPJ6   | HSP90AA1 protein (Fragment)                              | 7 | 68370.64  | H |
| P62937   | Peptidyl-prolyl cis-trans isomerase A                    | 7 | 18012.3   | H |
| A4IFP2   | KRT4 protein                                             | 6 | 58045.64  | B |
| O18977   | Tenascin-X                                               | 6 | 447378.84 | B |
| P68103   | Elongation factor 1-alpha 1                              | 6 | 50140.28  | B |
| Q3SZ57   | Alpha-fetoprotein                                        | 6 | 68586.95  | B |
| Q2KJD0   | Tubulin beta-5 chain                                     | 6 | 49670.28  | B |
| Q92626   | Peroxidasin homolog                                      | 6 | 165272.78 | H |
| B4DE59   | cDNA FLJ60424, highly similar to Junction plakoglobin    | 6 | 62615.29  | H |
| Q9NZS6   | Elongation factor 1-alpha (Fragment)                     | 6 | 46268.72  | H |
| Q5SU16   | Beta 5-tubulin                                           | 6 | 49670.28  | H |
| I1VZV6   | Hemoglobin alpha 1                                       | 6 | 15279.41  | H |
| F1MVS9   | Uncharacterized protein                                  | 5 | 81297.58  | B |
| P49907   | Selenoprotein P                                          | 5 | 43686.82  | B |
| Q2KJ63   | Plasma kallikrein                                        | 5 | 70993.3   | B |
| Q3SX14   | Gelsolin                                                 | 5 | 80729.71  | B |

|                |                                                                |   |           |   |
|----------------|----------------------------------------------------------------|---|-----------|---|
| Q3T0P6         | Phosphoglycerate kinase 1                                      | 5 | 44537.11  | B |
| G1K1X9         | Vitamin K-dependent protein Z                                  | 5 | 47734.83  | B |
| K4JDR8         | Alpha-2-macroglobulin variant 5                                | 5 | 45074.14  | B |
| Q0VCX2         | glucose-regulated protein                                      | 5 | 72399.13  | B |
| P01008         | Antithrombin-III                                               | 5 | 52601.83  | H |
| Q16270         | Insulin-like growth factor-binding protein 7                   | 5 | 29130.05  | H |
| Q2TSD0         | Glyceraldehyde-3-phosphate dehydrogenase                       | 5 | 36048.8   | H |
| P11021         | 78 kDa glucose-regulated protein                               | 5 | 72332.07  | H |
| B4DPR2         | cDNA FLJ50830, highly similar to Serum albumin                 | 5 | 59573.13  | H |
| G3V1N2         | HCG1745306, isoform CRA_a                                      | 5 | 11947.65  | H |
| A0A0A0M<br>PA0 | Uncharacterized protein                                        | 4 | 46882.16  | B |
| A5PJT7         | ECM1 protein                                                   | 4 | 57636.3   | B |
| A6QPD4         | LOC790886 protein                                              | 4 | 45427.87  | B |
| A7E3S8         | Heat shock 70kD protein binding protein                        | 4 | 41444.38  | B |
| F1MMK9         | Protein AMBP                                                   | 4 | 39293.46  | B |
| F1MMP5         | Inter-alpha-trypsin inhibitor heavy chain H1                   | 4 | 101236.44 | B |
| F1MPP2         | Uncharacterized protein                                        | 4 | 29049.99  | B |
| F1MR86         | Uncharacterized protein                                        | 4 | 33593.37  | B |
| F1MY85         | Complement C5a anaphylatoxin                                   | 4 | 189044.2  | B |
| F1N5M2         | Vitamin D-binding protein                                      | 4 | 53355.53  | B |
| G5E505         | Integrin-linked protein kinase                                 | 4 | 51493.77  | B |
| P00432         | Catalase                                                       | 4 | 59914.57  | B |
| P10096         | Glyceraldehyde-3-phosphate dehydrogenase                       | 4 | 35867.68  | B |
| P20959         | Insulin-like growth factor-binding protein 3                   | 4 | 31569.81  | B |
| P98140         | Coagulation factor XII                                         | 4 | 67159.64  | B |
| Q27967         | Secreted phosphoprotein 24                                     | 4 | 23133.89  | B |
| Q3SZV7         | Hemopexin                                                      | 4 | 52208.67  | B |
| E1BEL8         | Uncharacterized protein                                        | 4 | 16070.34  | B |
| O46375         | Transthyretin                                                  | 4 | 15726.78  | B |
| P17697         | Clusterin                                                      | 4 | 51113.36  | B |
| Q9TS85         | Histidine-rich GLYCOPROTEIN=FACTOR XIIIa substrate (Fragments) | 4 | 23982.36  | B |
| P00558         | Phosphoglycerate kinase 1                                      | 4 | 44614.2   | H |
| P01023         | Alpha-2-macroglobulin                                          | 4 | 163289.06 | H |
| P03956         | Interstitial collagenase                                       | 4 | 54006.23  | H |
| P10809         | 60 kDa heat shock protein, mitochondrial                       | 4 | 61053.94  | H |
| P39060         | Collagen alpha-1(XVIII) chain                                  | 4 | 178185.48 | H |
| Q13418         | Integrin-linked protein kinase                                 | 4 | 51418.66  | H |
| Q15582         | Transforming growth factor-beta-induced protein ig-h3          | 4 | 74680.04  | H |
| Q16658         | Fascin                                                         | 4 | 54529.35  | H |
| B7Z9A0         | FLJ56212, highly similar to Gelsolin                           | 4 | 83102.45  | H |

|        |                                             |   |           |   |
|--------|---------------------------------------------|---|-----------|---|
| E7EPG1 | Multimerin-1                                | 4 | 110751.27 | H |
| P02765 | Alpha-2-HS-glycoprotein                     | 4 | 39324.24  | H |
| P14625 | Endoplasmic                                 | 4 | 92467.76  | H |
| P04004 | Vitronectin                                 | 4 | 54304.97  | H |
| Q9BWU5 | Mutant hemoglobin beta chain (Fragment)     | 4 | 11501.07  | H |
| A2VDN8 | Coronin, actin binding protein, 1C          | 3 | 53125.26  | B |
| A5D792 | DCK protein                                 | 3 | 17680.22  | B |
| A5D7R6 | ITIH2 protein                               | 3 | 106185.12 | B |
| A6QPP2 | SERPIND1 protein                            | 3 | 55206.55  | B |
| A6QQA8 | Sulfhydryl oxidase                          | 3 | 62974.43  | B |
| A7YWB6 | LOC539596 protein                           | 3 | 74406.72  | B |
| A8E654 | COL18A1 protein                             | 3 | 135065.93 | B |
| D4QBB4 | Hemoglobin beta                             | 3 | 15954.2   | B |
| E1B726 | Plasminogen                                 | 3 | 91242.33  | B |
| E1B991 | Uncharacterized protein                     | 3 | 64333.02  | B |
| F1MAV0 | Fibrinogen beta chain                       | 3 | 56440.15  | B |
| F1MJK3 | Uncharacterized protein                     | 3 | 165608.65 | B |
| F1MUZ9 | 60 kDa heat shock protein, mitochondrial    | 3 | 60976.85  | B |
| O60687 | Sushi repeat-containing protein SRPX2       | 3 | 52971.33  | H |
| P00338 | L-lactate dehydrogenase A chain             | 3 | 36688.3   | H |
| P02649 | Apolipoprotein E                            | 3 | 36153.66  | H |
| P05121 | Plasminogen activator inhibitor 1           | 3 | 45059.47  | H |
| P06732 | Creatine kinase M-type                      | 3 | 43100.62  | H |
| P07814 | Bifunctional glutamate/proline--tRNA ligase | 3 | 170588.9  | H |
| P27348 | 14-3-3 protein theta                        | 3 | 27763.94  | H |
| Q96QV1 | Hedgehog-interacting protein                | 3 | 78850.52  | H |
| Q9Y4G6 | Talin-2                                     | 3 | 271610.07 | H |
| B2R4R0 | Histone H4                                  | 3 | 11367.2   | H |
| O95084 | Serine protease 23                          | 3 | 43000.75  | H |

**Table S3.** Proteins identified by LC-MS on PEGylated GNRs cultured with HREC for 48 h.

| Access <sup>a)</sup> | Protein Name                                                         | SpC <sup>b)</sup> | MV <sup>c)</sup> | Species <sup>d)</sup> |
|----------------------|----------------------------------------------------------------------|-------------------|------------------|-----------------------|
| P98160               | Basement membrane-specific heparan sulfate proteoglycan core protein | 76                | 468825.05        | H                     |
| P02769               | Serum albumin                                                        | 65                | 69292.69         | B                     |
| B0JYQ0               | ALB protein                                                          | 62                | 69292.74         | B                     |
| P07996               | Thrombospondin-1                                                     | 46                | 129381.43        | H                     |
| A0A024<br>R9Q1       | Thrombospondin 1, isoform CRA_a                                      | 46                | 129351.4         | H                     |
| F1N3A1               | Thrombospondin-1                                                     | 40                | 129390.46        | B                     |
| Q28178               | Thrombospondin-1                                                     | 39                | 129532.66        | B                     |
| F1MQ37               | Uncharacterized protein                                              | 37                | 227100.21        | B                     |

|        |                                                             |    |           |   |
|--------|-------------------------------------------------------------|----|-----------|---|
| E1BNR0 | Uncharacterized protein                                     | 36 | 515752.39 | B |
| Q28085 | Complement factor H                                         | 32 | 140372.52 | B |
| F1MER7 | Uncharacterized protein (Fragment)                          | 30 | 466023.94 | B |
| P35579 | Myosin-9                                                    | 30 | 226529.66 | H |
| Q7SIH1 | Alpha-2-macroglobulin                                       | 28 | 167574.07 | B |
| B0JYN6 | Alpha-2-HS-glycoprotein                                     | 25 | 38418.34  | B |
| P02751 | Fibronectin                                                 | 24 | 262621.56 | H |
| F1MC45 | Complement factor H (Fragment)                              | 22 | 96591.9   | B |
| Q28107 | Coagulation factor V                                        | 22 | 248980.17 | B |
| E1BH06 | Uncharacterized protein                                     | 21 | 192762.75 | B |
| P01044 | Kininogen-1                                                 | 20 | 68889.4   | B |
| Q2TBQ1 | Coagulation factor XIII, B polypeptide                      | 19 | 75166.21  | B |
| Q5M8T4 | Connective tissue growth factor                             | 19 | 38069.16  | H |
| Q2UVX4 | Complement C3                                               | 18 | 187250.98 | B |
| P01045 | Kininogen-2                                                 | 18 | 68709.21  | B |
| P02081 | Hemoglobin fetal subunit beta                               | 18 | 15859.03  | B |
| Q96QV1 | Hedgehog-interacting protein                                | 17 | 78850.52  | H |
| F1N169 | Uncharacterized protein                                     | 16 | 281051.32 | B |
| O02717 | Non-muscle myosin heavy chain (Fragment)                    | 16 | 72370.21  | B |
| Q27965 | Heat shock 70 kDa protein 1B                                | 16 | 70227.56  | B |
| Q28065 | C4b-binding protein alpha chain                             | 16 | 68885.75  | B |
| Q03247 | Apolipoprotein E                                            | 16 | 35979.44  | B |
| Q92626 | Peroxidasin homolog                                         | 16 | 165272.78 | H |
| P34955 | Alpha-1-antiproteinase                                      | 15 | 46103.42  | B |
| P08107 | Heat shock 70 kDa protein 1A/1B                             | 15 | 70051.38  | H |
| F1MVK1 | Uncharacterized protein (Fragment)                          | 14 | 173971.74 | B |
| P19120 | Heat shock cognate 71 kDa protein                           | 14 | 71239.66  | B |
| F1MDH3 | Uncharacterized protein (Fragment)                          | 14 | 270812.35 | B |
| F1MKS5 | Histidine-rich glycoprotein                                 | 14 | 60742.97  | B |
| Q9BGU1 | Histidine-rich glycoprotein                                 | 14 | 61947.27  | B |
| P11142 | Heat shock cognate 71 kDa protein                           | 14 | 70897.24  | H |
| P07589 | Fibronectin                                                 | 13 | 272150.41 | B |
| Q3ZBS7 | Uncharacterized protein                                     | 13 | 53574.53  | B |
| E7EPG1 | Multimerin-1                                                | 13 | 110751.27 | H |
| Q6MZF4 | Putative uncharacterized protein DKFZp686F219<br>(Fragment) | 13 | 122112.27 | H |
| F1MNVW | Inter-alpha-trypsin inhibitor heavy chain H2                | 12 | 106155.03 | B |
| 4      |                                                             |    |           |   |
| Q76LV1 | Heat shock protein HSP 90-beta                              | 12 | 83252.2   | B |
| O18739 | Connective tissue growth factor                             | 12 | 37923.87  | B |
| P00735 | Prothrombin                                                 | 12 | 70504.75  | B |
| Q99715 | Collagen alpha-1(XII) chain                                 | 12 | 333142.67 | H |
| Q60FE5 | Filamin A                                                   | 12 | 278223.09 | H |
| P08238 | Heat shock protein HSP 90-beta                              | 12 | 83263.22  | H |

|            |                                                                    |    |           |   |
|------------|--------------------------------------------------------------------|----|-----------|---|
| A5D984     | Pyruvate kinase 3                                                  | 11 | 57948.27  | B |
| A5PJW9     | HHIP protein                                                       | 11 | 78536.16  | B |
| F1N2P8     | Insulin-like growth factor-binding protein 2                       | 11 | 30784.95  | B |
| G3X7F3     | Uncharacterized protein (Fragment)                                 | 11 | 74144.22  | B |
| P41361     | Antithrombin-III                                                   | 11 | 52346.55  | B |
| V6F9A2     | Apolipoprotein A-I preproprotein                                   | 11 | 30275.95  | B |
| P60709     | Actin, cytoplasmic 1                                               | 11 | 41736.29  | H |
| B8ZX62     | Tissue plasminogen activator                                       | 11 | 62964.55  | H |
| V9HW11     | Epididymis secretory sperm binding protein Li<br>83p               | 11 | 51146.95  | H |
| V9HWB<br>8 | Pyruvate kinase                                                    | 11 | 57936.25  | H |
| Q9Y490     | Talin-1                                                            | 11 | 269764.06 | H |
| A5PJE3     | Fibrinogen alpha chain                                             | 10 | 66997.31  | B |
| P63258     | Actin, cytoplasmic 2                                               | 10 | 41792.4   | B |
| Q2KIG3     | Carboxypeptidase B2                                                | 10 | 48821.13  | B |
| P01966     | Hemoglobin subunit alpha                                           | 10 | 15184.18  | B |
| P33433     | Histidine-rich glycoprotein (Fragments)                            | 10 | 44470.06  | B |
| G3V511     | Latent-transforming growth factor beta-binding<br>protein 2        | 10 | 189239.69 | H |
| P06733     | Alpha-enolase                                                      | 10 | 47168.41  | H |
| P68133     | Actin, alpha skeletal muscle                                       | 10 | 42050.59  | H |
| F1MY85     | Complement C5a anaphylatoxin                                       | 9  | 189044.2  | B |
| A4IFM8     | Actin, alpha 1, skeletal muscle                                    | 9  | 42022.58  | B |
| Q9XSJ4     | Alpha-enolase                                                      | 9  | 47325.58  | B |
| Q9Y4K0     | Lysyl oxidase homolog 2                                            | 9  | 86723.9   | H |
| Q53FK3     | Matrix metalloproteinase 1 preproprotein variant<br>(Fragment)     | 9  | 53976.21  | H |
| P05121     | Plasminogen activator inhibitor 1                                  | 9  | 45059.47  | H |
| P02768     | Serum albumin                                                      | 9  | 69365.97  | H |
| P28800     | Alpha-2-antiplasmin                                                | 8  | 54710.2   | B |
| Q3SZ57     | Alpha-fetoprotein                                                  | 8  | 68586.95  | B |
| Q5EA25     | Sushi repeat-containing protein SRPX2                              | 8  | 53067.65  | B |
| Q76LV2     | Heat shock protein HSP 90-alpha                                    | 8  | 84729.76  | B |
| G3N0V2     | Uncharacterized protein                                            | 8  | 63150.56  | B |
| P62935     | Peptidyl-prolyl cis-trans isomerase A                              | 8  | 17869.16  | B |
| K9JA46     | Epididymis luminal secretory protein 52                            | 8  | 84658.73  | H |
| M5FKF4     | Insulin-like growth factor binding protein, acid<br>labile subunit | 7  | 65992.41  | B |
| Q92176     | Coronin-1A                                                         | 7  | 50978.63  | B |
| F1MJH1     | Gelsolin                                                           | 7  | 80701.66  | B |
| G3MXL3     | Uncharacterized protein (Fragment)                                 | 7  | 62891.54  | B |
| G3N0S9     | Uncharacterized protein                                            | 7  | 22335.74  | B |
| Q28194     | Thrombospondin-1 (Fragment)                                        | 7  | 25015.17  | B |

|        |                                                                   |   |           |   |
|--------|-------------------------------------------------------------------|---|-----------|---|
| O60687 | Sushi repeat-containing protein SRPX2                             | 7 | 52971.33  | H |
| C9JMY1 | Insulin-like growth factor-binding protein 2                      | 7 | 20280.87  | H |
| Q6IPN6 | Elongation factor 1-alpha                                         | 7 | 50122.24  | H |
| B2RE56 | Peptidyl-prolyl cis-trans isomerase                               | 7 | 18008.31  | H |
| A5PJT7 | ECM1 protein                                                      | 6 | 57636.3   | B |
| F1N4K8 | Fibrillin-1                                                       | 6 | 312247.58 | B |
| G8JKW7 | Uncharacterized protein                                           | 6 | 46343.7   | B |
| Q9TS85 | Histidine-rich GLYCOPROTEIN=FACTOR<br>XIIIa substrate (Fragments) | 6 | 23982.36  | B |
| A6QQA8 | Sulfhydryl oxidase                                                | 6 | 62974.43  | B |
| P68103 | Elongation factor 1-alpha 1                                       | 6 | 50140.28  | B |
| P02070 | Hemoglobin subunit beta                                           | 6 | 15954.2   | B |
| E1BEL8 | Uncharacterized protein                                           | 6 | 16070.34  | B |
| P07355 | Annexin A2                                                        | 6 | 38603.6   | H |
| P35555 | Fibrillin-1                                                       | 6 | 312235.65 | H |
| A0A0A0 | Gelsolin                                                          | 6 | 84744.29  | H |
| MT01   |                                                                   |   |           |   |
| P02765 | Alpha-2-HS-glycoprotein                                           | 6 | 39324.24  | H |
| Q9BWU  | Mutant hemoglobin beta chain (Fragment)                           | 6 | 11501.07  | H |
| 5      |                                                                   |   |           |   |
| P69905 | Hemoglobin subunit alpha                                          | 6 | 15257.36  | H |
| F1N401 | Collagen alpha-1(XII) chain                                       | 5 | 340074.21 | B |
| G3X6N3 | Serotransferrin                                                   | 5 | 77665.31  | B |
| P04272 | Annexin A2                                                        | 5 | 38611.63  | B |
| Q27967 | Secreted phosphoprotein 24                                        | 5 | 23133.89  | B |
| Q2KJ63 | Plasma kallikrein                                                 | 5 | 70993.3   | B |
| Q3ZCJ7 | Tubulin alpha-1C chain                                            | 5 | 49856.71  | B |
| G1K1X9 | Vitamin K-dependent protein Z                                     | 5 | 47734.83  | B |
| P68363 | Tubulin alpha-1B chain                                            | 5 | 50151.07  | H |
| Q16270 | Insulin-like growth factor-binding protein 7                      | 5 | 29130.05  | H |
| Q99988 | Growth/differentiation factor 15                                  | 5 | 34139.85  | H |
| D3DSM4 | Collagen, type XVIII, alpha 1, isoform CRA_d                      | 5 | 135507.96 | H |
| E5RGA1 | Tissue-type plasminogen activator (Fragment)                      | 5 | 20078.57  | H |
| P00734 | Prothrombin                                                       | 5 | 70036.12  | H |
| G3V1N2 | HCG1745306, isoform CRA_a                                         | 5 | 11947.65  | H |
| Q96T46 | Hemoglobin alpha 2 (Fragment)                                     | 5 | 8391.38   | H |
| A2VDN8 | Coronin, actin binding protein, 1C                                | 4 | 53125.26  | B |
| A5D7S8 | Fibulin-1                                                         | 4 | 77529.65  | B |
| A6QLY8 | IGFBP7 protein                                                    | 4 | 29078     | B |
| A6QPD4 | LOC790886 protein                                                 | 4 | 45427.87  | B |
| A6QPP2 | SERPIND1 protein                                                  | 4 | 55206.55  | B |
| F1MAV0 | Fibrinogen beta chain                                             | 4 | 56440.15  | B |
| F1MJ12 | Complement C1s subcomponent                                       | 4 | 77381.29  | B |
| F1MTT3 | Coagulation factor XII                                            | 4 | 67234.67  | B |



|            |                                                       |   |           |   |
|------------|-------------------------------------------------------|---|-----------|---|
| F1MVS9     | Uncharacterized protein                               | 4 | 81297.58  | B |
| G3MZ95     | Uncharacterized protein                               | 4 | 31909.53  | B |
| K4JDR8     | Alpha-2-macroglobulin variant 5                       | 4 | 45074.14  | B |
| P52898     | Dihydrodiol dehydrogenase 3                           | 4 | 36783.88  | B |
| Q1RMN9     | C4b-binding protein alpha-like                        | 4 | 21996.34  | B |
| Q2KIV9     | Complement C1q subcomponent subunit B                 | 4 | 26398.91  | B |
| Q3MHL4     | Adenosylhomocysteinase                                | 4 | 47637.45  | B |
| Q95M18     | Endoplasmic                                           | 4 | 92425.6   | B |
| A6QLC4     | CDH1 protein                                          | 4 | 97973.51  | B |
| P17697     | Clusterin                                             | 4 | 51113.36  | B |
| P52556     | Flavin reductase (NADPH)                              | 4 | 22132.09  | B |
| Q0VCX2     | 78 kDa glucose-regulated protein                      | 4 | 72399.13  | B |
| Q1RMH5     | C1QC protein (Fragment)                               | 4 | 29022.83  | B |
| Q2HJ49     | Moesin                                                | 4 | 67974.39  | B |
| Q15582     | Transforming growth factor-beta-induced protein ig-h3 | 4 | 74680.04  | H |
| A0A024R611 | Coronin                                               | 4 | 51025.7   | H |
| A0A024R8E5 | Collagen, type V, alpha 1, isoform CRA_a              | 4 | 183557.64 | H |
| A0A024RBI5 | Coronin                                               | 4 | 53248.46  | H |
| A0A0A0MRJ7 | Coagulation factor V                                  | 4 | 252233.03 | H |
| O95084     | Serine protease 23                                    | 4 | 43000.75  | H |
| P14625     | Endoplasmic                                           | 4 | 92467.76  | H |
| P26038     | Moesin                                                | 4 | 67819.26  | H |
| J7M2B1     | Tyrosine-protein kinase receptor                      | 4 | 98947.39  | H |
| V9HWB4     | Epididymis secretory sperm binding protein Li 89n     | 4 | 72332.07  | H |
| A4FV50     | MGC142792 protein                                     | 3 | 38421.35  | B |
| A5D9E9     | Complement component 1, r subcomponent                | 3 | 80212.02  | B |
| P01024     | Complement C3                                         | 3 | 187145.88 | H |
| P07737     | Profilin-1                                            | 3 | 15054.07  | H |

a)UniProt accession number; b)Total spectral counts; c)Protein molecular weight, calculated from the theoretical amino acid sequence; d) Species of origin: ‘B’ is bovine protein from fetal bovine serum; ‘H’ is human protein from HREC cells.
